# Supplementary material for: A one-step laser process for rapid manufacture of mesoscopic perovskite solar cells prepared under high relative humidity
Source: Royal Society of Chemistry journal article supplement (doi:10.1039/c8se00043c), 2018-01-01
Supplement: c8se00043c1.pdf [file c8se00043c1.pdf]

## Supporting Information

# **A one-step laser process for rapid manufacture of mesoscopic perovskite solar cells prepared under high relative humidity**

*Qian Chen<sup>†</sup>, Muhamad Z. Mokhtar<sup>†</sup>, Jack Chun-Ren Ke<sup>‡§</sup>, Andrew G. Thomas<sup>†‡</sup>, Aseel Hadi<sup>†</sup>,  
Eric Whittaker<sup>‡</sup>, Michele Curioni<sup>†</sup> and Zhu Liu<sup>\*†</sup>*

<sup>†</sup>School of Materials, The University of Manchester, Manchester, M13 9PL, UK

<sup>‡</sup>Photon Science Institute, The University of Manchester, Manchester, M13 9PL, UK.

<sup>§</sup>School of Physics and Astronomy, the University of Manchester, Manchester M13 9PL, UK

### **Corresponding Authors**

Zhu Liu

Tel.: 0044 1613064845

\*E-mail: [zhu.liu@manchester.ac.uk](mailto:zhu.liu@manchester.ac.uk)

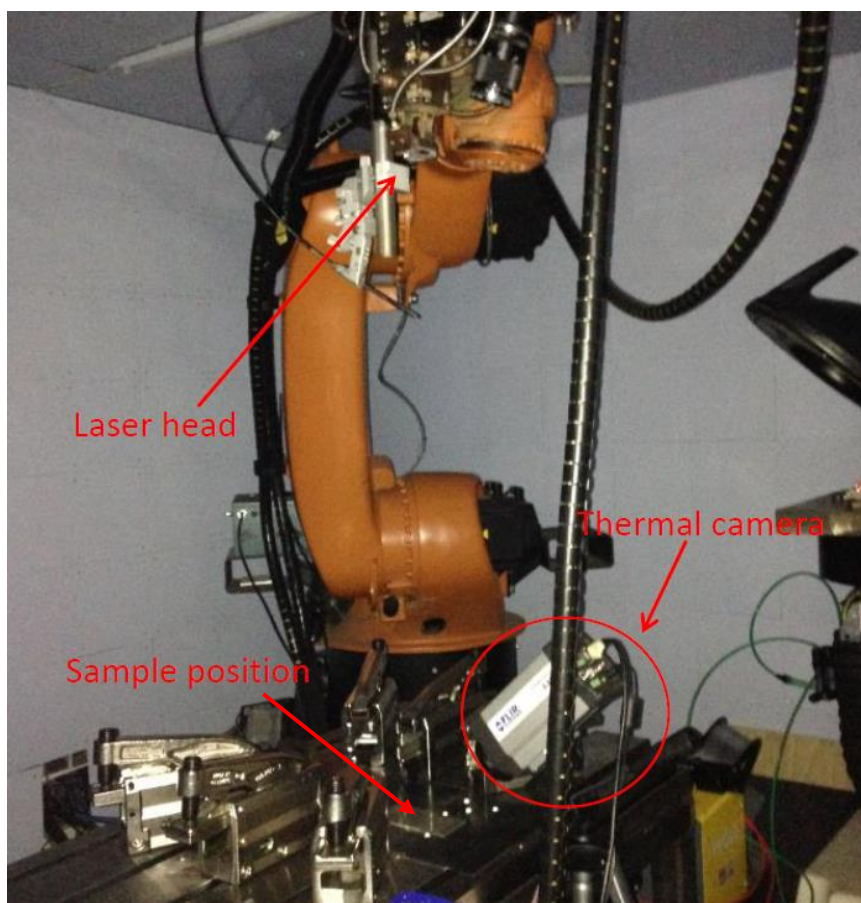

Figure S1. A photograph of the laser set-up for the rapid fabrication of both mesoporous and compact TiO<sub>2</sub> films.

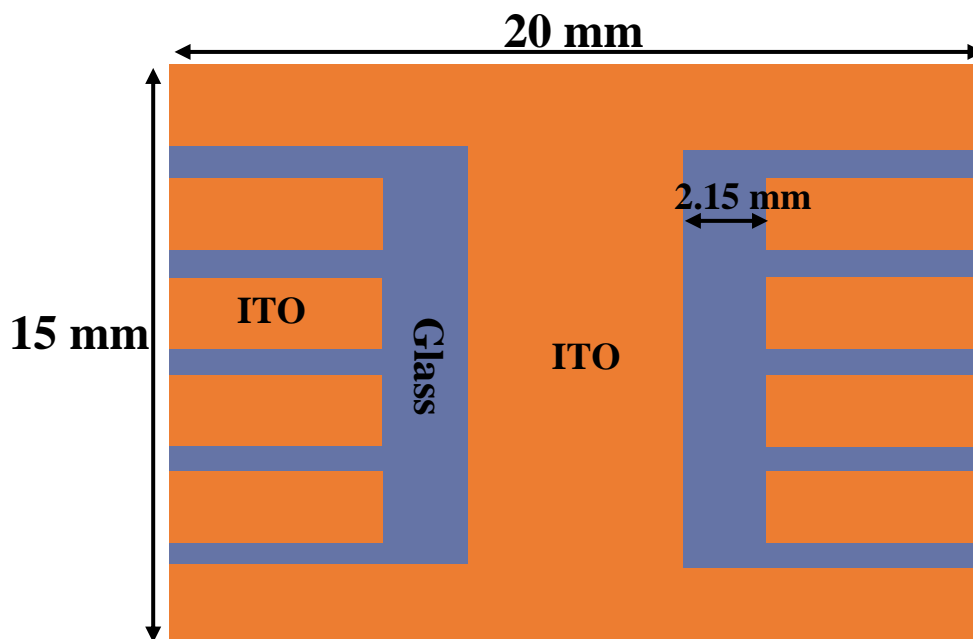

Figure S2. A schematic representation of laser-patterned ITO on glass with a laser isolation line of 2.15 mm in width.

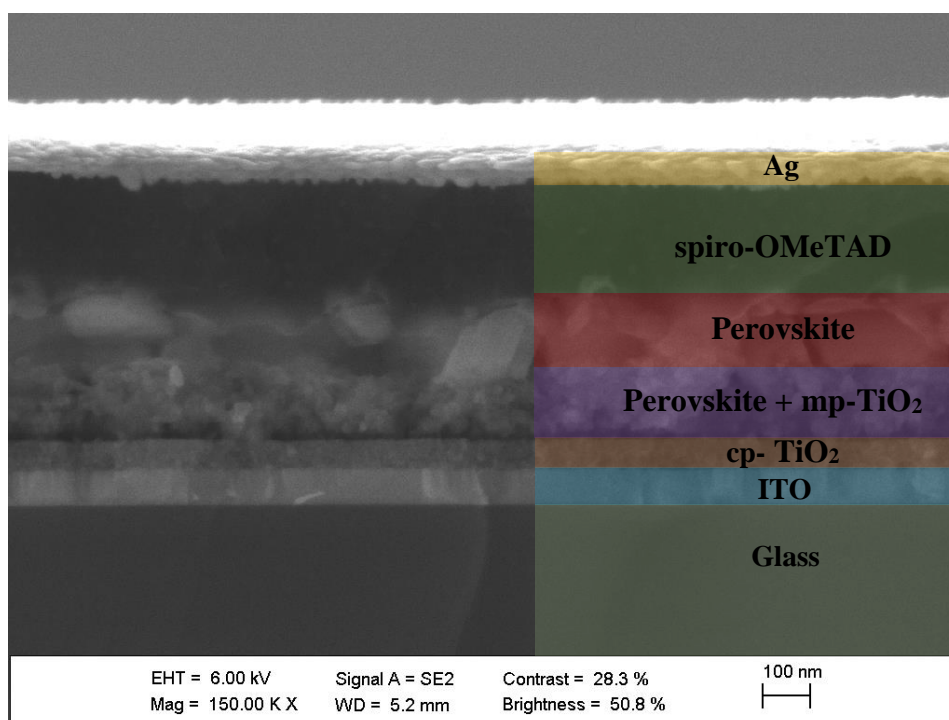

Figure S3. SEM cross-sectional view of the PSCs fabricated in an environment with a relative humidity around 60% based on a configuration of ITO/compact TiO<sub>2</sub>/mp-TiO<sub>2</sub>/perovskite/spiro-MeOTAD/Ag.

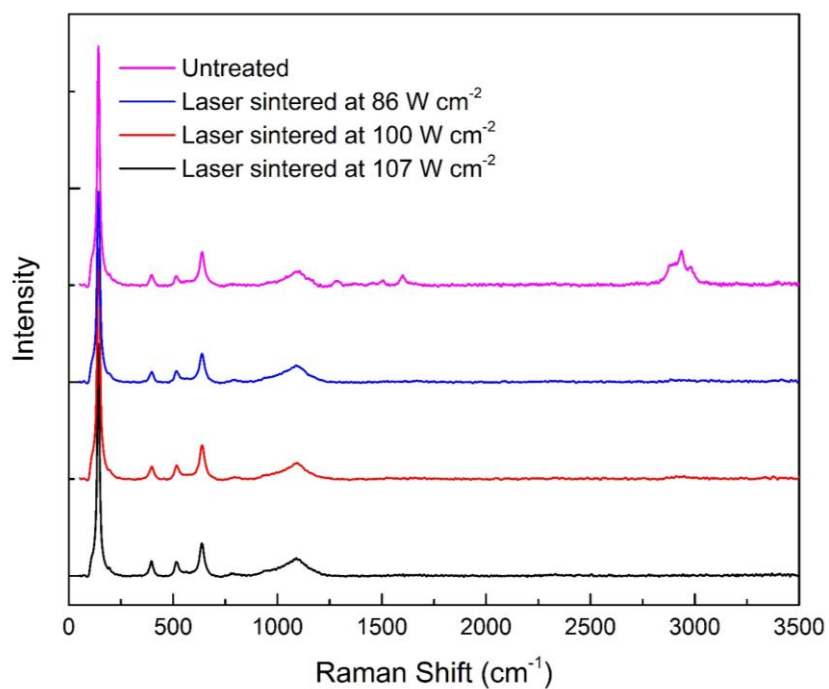

Figure S4. Raman spectra of untreated and laser sintered TiO<sub>2</sub> mesoporous structures at 86, 100 and 107 W cm<sup>-2</sup>.

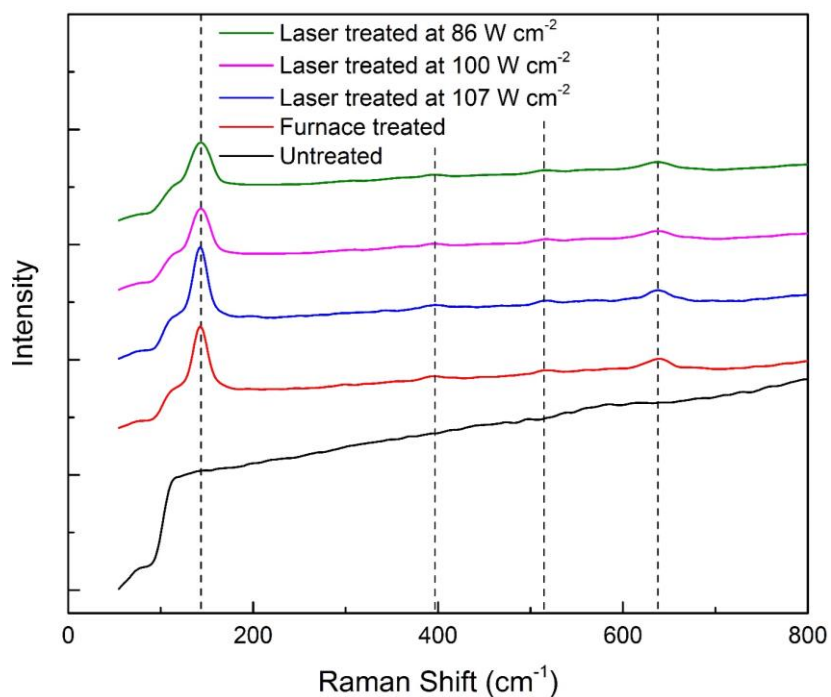

Figure S5. Raman spectra of untreated, furnace and laser treated compact TiO<sub>2</sub> films at 86, 100 and 107 W cm<sup>-2</sup>.

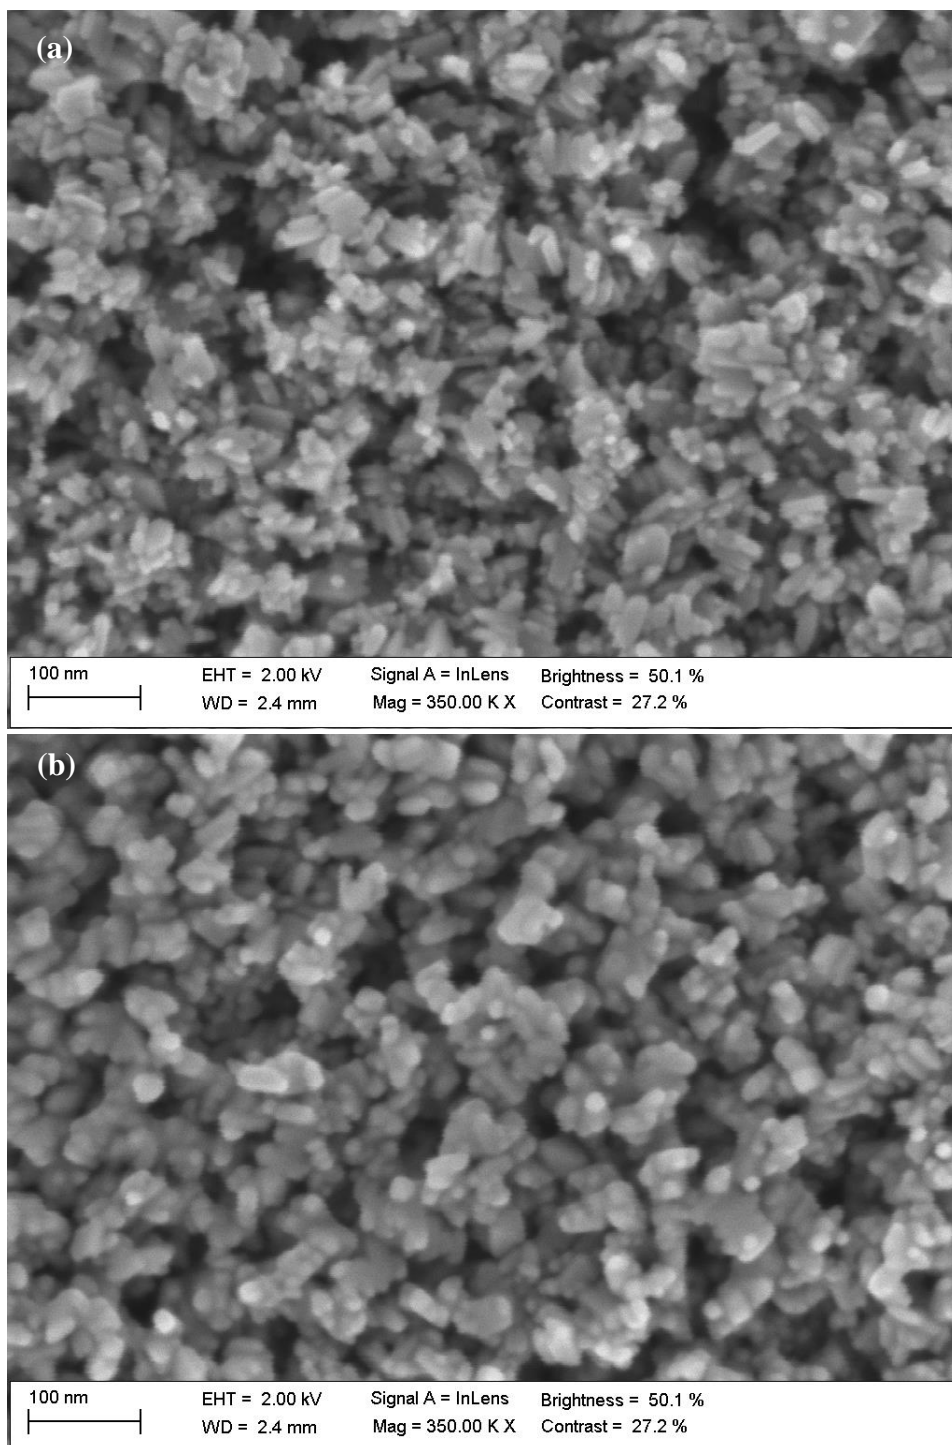

Figure S6. SEM images of top views of laser treated TiO<sub>2</sub> mesoporous structures at (a) 86 and (b) 107 W cm<sup>-2</sup>.

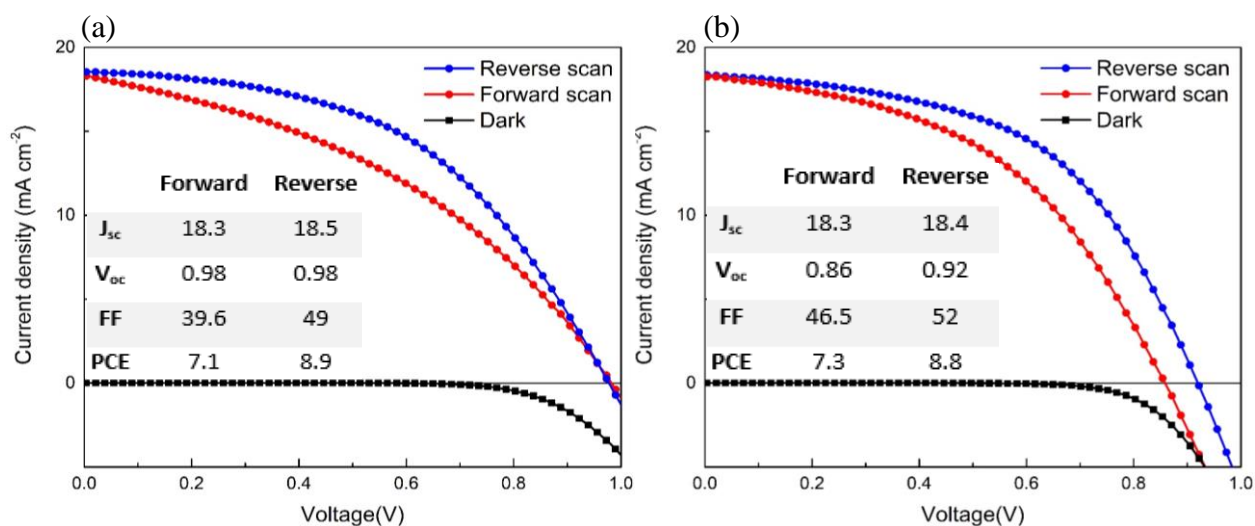

Figure S7. Current density-voltage (J-V) curves of perovskite solar cells produced by (a) 2 h furnace treatment and (b) laser treated for 1 min at 107 W cm<sup>-2</sup> densities under standard AM 1.5G condition with a relative humidity at 60%.

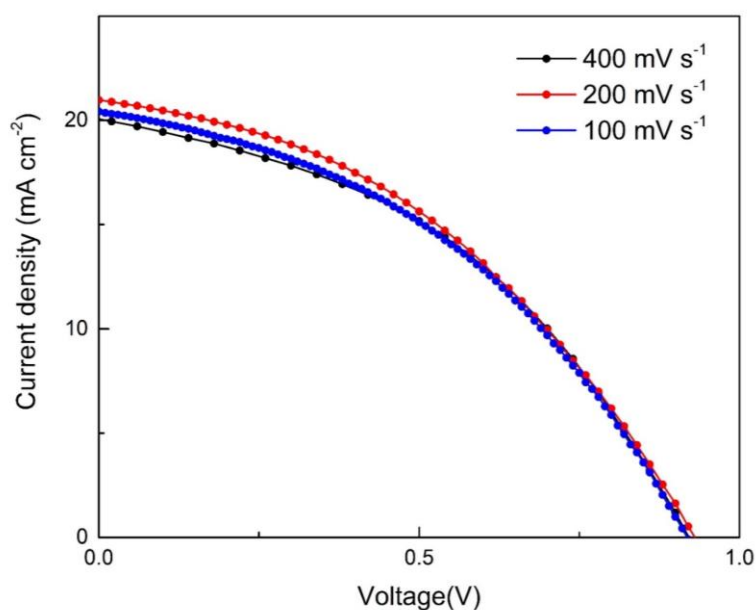

Figure S8. Current density-voltage (J-V) curves of perovskite solar cells produced by different scan rates under standard AM 1.5G condition with a relative humidity at 60%.

Table S1. Summary of photovoltaic parameters of the perovskite solar cells produced in our work at relative humidity around 60% with a one-step deposition method compared to several recent works.

| Year            | Perovskite type                                                               | Average PCE | Deposition method | Humidity | Reference |
|-----------------|-------------------------------------------------------------------------------|-------------|-------------------|----------|-----------|
| <b>Our work</b> | CH <sub>3</sub> NH <sub>3</sub> PbI <sub>3</sub> with 5% Pb(SCN) <sub>2</sub> | 8.2         | One-step          | 60       | –         |
| 2017            | CH <sub>3</sub> NH <sub>3</sub> PbI <sub>3</sub>                              | 6.68        | One-step          | 40       | [1]       |
| 2017            | CH <sub>3</sub> NH <sub>3</sub> PbI <sub>3-x</sub> Cl <sub>x</sub>            | 6.3         | One-step          | 20       | [2]       |
| 2017            | CH <sub>3</sub> NH <sub>3</sub> PbI <sub>3</sub>                              | 10.0        | One-step          | 70       | [3]       |
| 2016            | CH <sub>3</sub> NH <sub>3</sub> PbI <sub>3-x</sub> Cl <sub>x</sub>            | 7.63        | One-step          | 50       | [4]       |
| 2017            | CH <sub>3</sub> NH <sub>3</sub> PbI <sub>3</sub>                              | 12          | One-step          | 75       | [5]       |
| 2016            | CH <sub>3</sub> NH <sub>3</sub> PbI <sub>3-x</sub> Cl <sub>x</sub>            | 8.3         | Spay-cast         | 55       | [6]       |
| 2017            | CH <sub>3</sub> NH <sub>3</sub> PbI <sub>3</sub>                              | 7.19        | Two-step          | 60-70    | [7]       |
| 2016            | CH <sub>3</sub> NH <sub>3</sub> PbI <sub>3</sub>                              | 6.16        | Two-step          | 50       | [8]       |
| 2017            | CH <sub>3</sub> NH <sub>3</sub> PbI <sub>3</sub>                              | 10.88       | Two-step          | 50-60    | [9]       |
| 2016            | CH <sub>3</sub> NH <sub>3</sub> PbI <sub>3</sub>                              | 8.3         | Two-step          | 60       | [10]      |
| 2017            | CH <sub>3</sub> NH <sub>3</sub> PbI <sub>3</sub>                              | 8.0         | Two-step          | –        | [11]      |
| 2016            | CH <sub>3</sub> NH <sub>3</sub> PbI <sub>3</sub>                              | 8.2         | Two-step          | 60       | [12]      |

## Reference

- [1] S. Prathapani, V. More, S. Bohm, P. Bhargava, A. Yella, and S. Mallick, "TiO<sub>2</sub> colloid-based compact layers for hybrid lead halide perovskite solar cells," *Appl. Mater. Today*, 2017, 7, 112–119.
- [2] H. M. Cronin, K. D. G. I. Jayawardena, Z. Stoeva, M. Shkunov, and S. R. P. Silva, "Effects of ambient humidity on the optimum annealing time of mixed-halide Perovskite solar cells," *Nanotechnology*, 2017, 28, 114004.
- [3] J. Ciro, R. Betancur, S. Mesa, and F. Jaramillo, "High performance perovskite solar cells fabricated under high relative humidity conditions," *Sol. Energy Mater. Sol. Cells*, 2017, 163, 38–42.
- [4] G. Wang *et al.*, "Efficient perovskite solar cell fabricated in ambient air using one-step spin-coating," *RSC Adv.*, 2016, 6, 43299–43303.
- [5] J. Troughton, K. Hooper, and T. M. Watson, "Humidity resistant fabrication of CH<sub>3</sub>NH<sub>3</sub>PbI<sub>3</sub> perovskite solar cells and modules," *Nano Energy*, 2017, 39, 60–68.
- [6] D. K. Mohamad, J. Griffin, C. Bracher, A. T. Barrows, and D. G. Lidzey, "Spray-Cast Multilayer Organometal Perovskite Solar Cells Fabricated in Air," *Adv. Energy Mater.*, 2016, 6, 1600994.
- [7] N. Slavath *et al.*, "Effect of hole-transporting materials on the photovoltaic performance and stability of all-ambient-processed perovskite solar cells," *J. Energy Chem.*, vol. 26, no. 3, pp. 584–591, 2017.
- [8] Z. Liu, T. Shi, Z. Tang, B. Sun, and G. Liao, "Using a low-temperature carbon electrode for preparing hole-conductor-free perovskite heterojunction solar cells under high relative humidity," *Nanoscale*, vol. 8, no. 13, pp. 7017–7023, 2016.
- [9] C. Liu *et al.*, "Efficient and Stable Perovskite Solar Cells Prepared in Ambient Air Based on Surface-Modified Perovskite Layer," *J. Phys. Chem. C*, vol. 121, no. 12, pp. 6546–6553, 2017.
- [10] G. Murugadoss *et al.*, "An efficient electron transport material of tin oxide for planar structure perovskite solar cells," *J. Power Sources*, vol. 307, pp. 891–897, 2016.
- [11] S. Rahmany, M. Layani, S. Magdassi, and L. Etgar, "Fully functional semi-transparent perovskite solar cell fabricated in ambient air," *Sustain. Energy Fuels*, 2017, 1, 2120–2127.
- [12] M. K. Gangishetty, R. W. J. Scott, and T. L. Kelly, "Effect of relative humidity on crystal growth, device performance and hysteresis in planar heterojunction perovskite solar cells," *Nanoscale*, vol. 8, no. 12, pp. 6300–6307, 2016.
